# Supplementary material for: Virtual Reality and EEG-Based Intelligent Agent in Older Adults With Subjective Cognitive Decline: A Feasibility Study for Effects on Emotion and Cognition
Source: Frontiers journal article supplement (doi:10.3389/frvir.2021.807991), 2022-01-19
Supplement: Table_3.DOCX [file Table_3.DOCX]

**Supplemental Table 3.** Working memory and attention tasks pre- vs post-music intervention

| **Task (/maximum score)** | **Intervention** | **Pre-intervention (SD)** | **Post-intervention (SD)** | **Group** | **Time** | **Time X Group Interaction** |
| --- | --- | --- | --- | --- | --- | --- |
| WM 1 (/6) | Music | 4.16 (0.60) | 4.53 (0.91) | *F*(1,36) = .95, *p* = .34 | *F*(1,36) = .03,  *p* = .86 | *F*(1,36) = 5.24,  ***p* < .05**; ωp2 = .03 |
| Control | 4.73 (1.05) | 4.42 (.90) |
| WM 2 (/10) | Music | 5.95 (2.46) | 6.84 (2.12) | *F*(1,36) = .002, *p* = 97 | *F*(1,36) = .08,  *p* = .77 | *F*(1,36) = 5.03,  ***p* < .01**; ωp2 = .04 |
| Control | 6.94 (2.30) | 5.79 (2.57) |
| WM 3 (/2) | Music | 0.89 (0.74) | 1.63 (0.68) | *F*(1,36) = .28, *p* = .60 | *F*(1,36) = 11.84,  ***p* < .01**; ωp2 = .06 | *F*(1,36) = 11.84,  ***p* < .01**; ωp2 = .06 |
| Control | 1.16 (.69) | 1.16 (.69) |
| WM 4 (/8) | Music | 6.79 (1.72) | 7.32 (1.34) | *F*(1,36) = .004, *p* = .95 | *F*(1,36) = 1.34,  *p* = .25 | *F*(1,36) = .90,  *p* = .35 |
| Control | 1.33 (.31) | 1.61 (.37) |
| Attention 1 (/11) | Music | 10.63 (0.90) | 10.84 (0.50) | *F*(1,36) = 1.99, *p* = .17 | *F*(1,36) = .35,  *p* = .56 | *F*(1,36) = 3.11,  *p* = .09 |
| Control | 11.00 (.00) | 10.89 (.31) |
| Attention 2 (/6) | Music | 5.63 (0.60) | 5.84 (0.38) | *F*(1,36) = .62, *p* = .43 | *F*(1,36) = 2.62,  *p* = .11 | *F*(1,36) = .05,  *p* = .82 |
| Control | 5.42 (1.22) | 5.58 (1.39) |

N/A, Not Applicable; SD, Standard Deviation, WM, Working Memory
